# Supplementary material for: Microporous carbonaceous adsorbent prepared from a pyrolyzed polymer
Source: Royal Society of Chemistry journal article supplement (doi:10.1039/d4ma00141a), 2024-01-01
Supplement: d4ma00141a1.pdf [file d4ma00141a1.pdf]

Table S1 Selected polymers for initial TGA analysis.

| Designation | Polymer                          | Structure of polymer                                                                 |
|-------------|----------------------------------|--------------------------------------------------------------------------------------|
| PS          | Polystyrene                      | 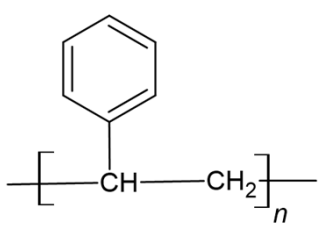   |
| COC         | Copolymer<br>norbornene ethylene |    |
| PEEK        | Polyetheretherketone             |   |
| PC          | Polycarbonate                    |  |

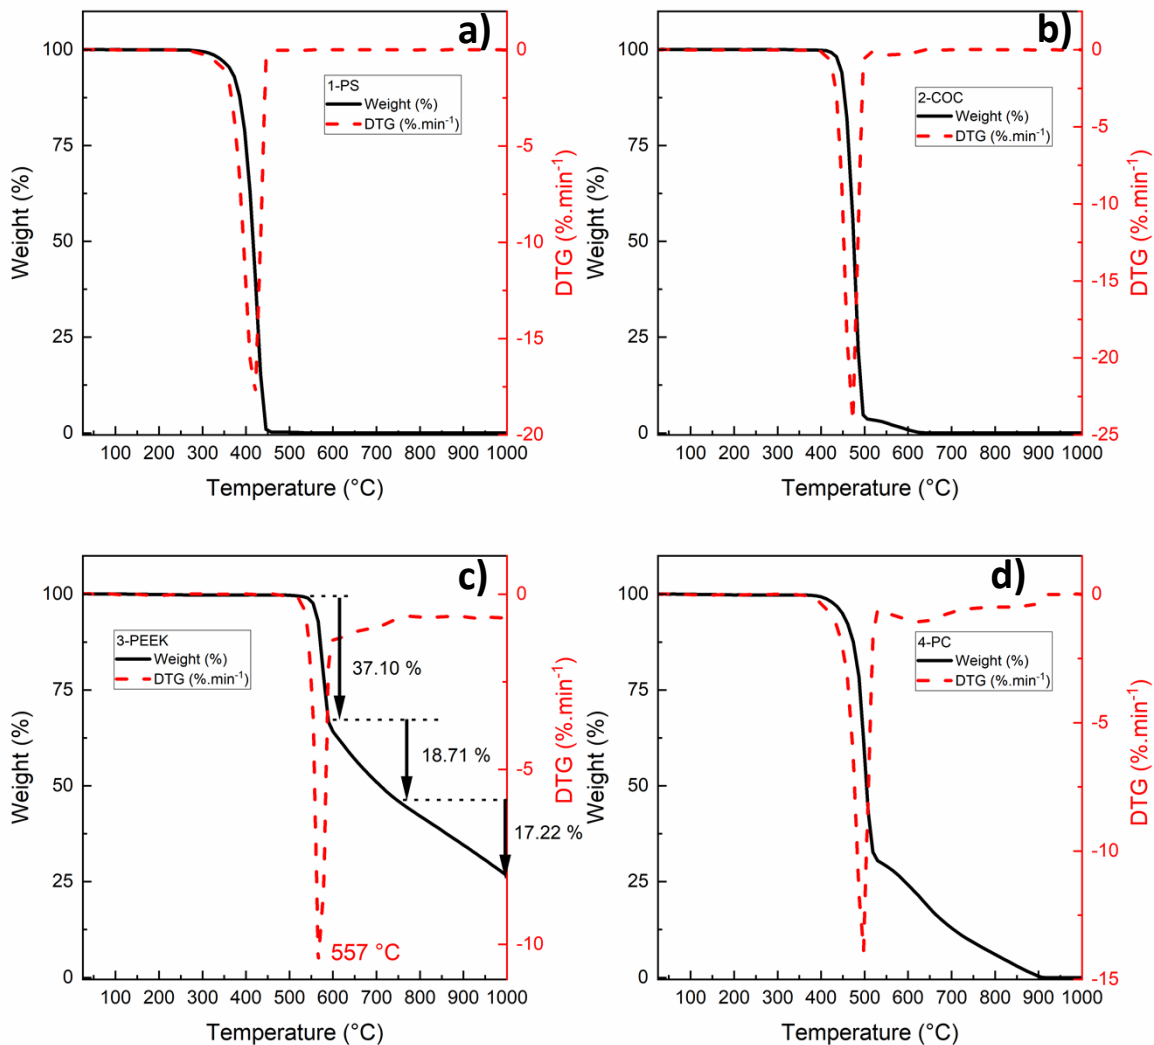

Fig.S1 Initial TGA of selected polymers.

Table S2 Chemical composition of pristine PEEK and pyrolyzed PEEK determined by XRF.

| Element | Material             |                       |
|---------|----------------------|-----------------------|
|         | Pristine PEEK<br>wt% | Pyrolyzed PEEK<br>wt% |
| Mg      | < 0.0020             | < 0.0028              |
| Al      | < 0.0020             | 0.077                 |
| Si      | 0.059                | 0.377                 |
| P       | 0.154                | 0.519                 |
| S       | 0.021                | 0.028                 |
| Cl      | 0.038                | 0.001                 |
| K       | 0.004                | 0.324                 |
| Ca      | 0.103                | 0.285                 |
| Ti      | 0.001                | 0.007                 |
| V       | 0.0000               | 0.000                 |
| Cr      | 0.000                | 0.003                 |
| Mn      | 0.000                | 0.003                 |
| Fe      | 0.003                | 0.060                 |

|          |          |          |
|----------|----------|----------|
| Co       | < 0.0004 | 0.001    |
| Ni       | 0.001    | 0.003    |
| Cu       | 0.000    | 0.000    |
| Zn       | 0.000    | 0.004    |
| Ga       | 0.000    | 0.000    |
| Ge       | 0.0000   | 0.0000   |
| As       | 0.0000   | 0.000    |
| Se       | 0.0000   | 0.0000   |
| Br       | 0.0000   | 0.000    |
| Rb       | 0.000    | 0.000    |
| Sr       | 0.000    | 0.000    |
| Y        | 0.000    | 0.000    |
| Zr       | < 0.0001 | 0.000    |
| Nb       | 0.000    | 0.000    |
| Mo       | 0.001    | 0.001    |
| Ag       | < 0.0002 | < 0.0002 |
| Cd       | 0.000    | 0.000    |
| Sn       | < 0.0003 | 0.000    |
| Sb       | < 0.0003 | < 0.0003 |
| Te       | 0.000    | 0.000    |
| I        | < 0.0003 | 0.000    |
| Cs       | < 0.0004 | < 0.0003 |
| Ba       | < 0.0002 | < 0.0002 |
| La       | 0.003    | 0.000    |
| Ce       | < 0.0002 | < 0.0002 |
| Pr       | < 0.0002 | < 0.0001 |
| Nd       | 0.000    | 0.001    |
| Hf       | 0.000    | 0.000    |
| Ta       | 0.002    | 0.002    |
| W        | 0.001    | 0.003    |
| Hg       | < 0.0001 | < 0.0001 |
| Tl       | 0.0000   | 0.000    |
| Pb       | 0.000    | 0.000    |
| Bi       | < 0.0001 | < 0.0001 |
| Th       | 0.000    | 0.000    |
| U        | 0.000    | < 0.0001 |
| Summary: | 0.40     | 1.70     |

Table S3 FTIR bands

| Wavenumbers (cm <sup>-1</sup> ) | Assignment of band                                               | Note              |
|---------------------------------|------------------------------------------------------------------|-------------------|
| 3309                            | stretching vibration of O-H in alcohol and phenols               |                   |
| 3180                            | stretching vibration of O-H in moisture                          |                   |
|                                 |                                                                  |                   |
| 3047                            | stretching vibration of =C-H in aromatic hydrocarbons            |                   |
| 2956                            | stretching vibration of C-H in aliphatic hydrocarbons (alkanes); | asymmetrical mode |
| 2874                            | vibration of CH <sub>3</sub> groups                              | symmetrical mode  |
| 2922                            | stretching vibration of C-H in aliphatic hydrocarbons (alkanes); | asymmetrical mode |

|      |                                                           |                              |
|------|-----------------------------------------------------------|------------------------------|
| 2852 | vibration of CH <sub>2</sub> groups                       | symmetrical mode             |
| 1709 | stretching vibration of C=O in esters                     |                              |
| 1585 | stretching vibration of C=C in aromatic hydrocarbons      | skeletal ring breathing mode |
| 1405 | deformation vibration of C-H in aliphatic hydrocarbons    | CH <sub>2</sub> groups       |
| 1332 |                                                           | CH groups                    |
| 1308 |                                                           | CH <sub>2</sub> groups       |
| 1173 | stretching vibration of C-O in esters                     |                              |
| 1030 | stretching vibration of C-O in esters                     |                              |
| 1252 | stretching vibration of C-OH in phenols                   |                              |
| 1118 | stretching vibration of C-OH in aliphatic alcohols        | secondary alcohols           |
| 1061 |                                                           | primary alcohols             |
| 866  | out-of-plane deformation of =C-H in aromatic hydrocarbons | 1 isolated H atom            |
| 806  |                                                           | 2 adjacent H atoms           |
| 793  |                                                           | 3 adjacent H atoms           |
| 744  |                                                           | 4 or 5 adjacent H atoms      |

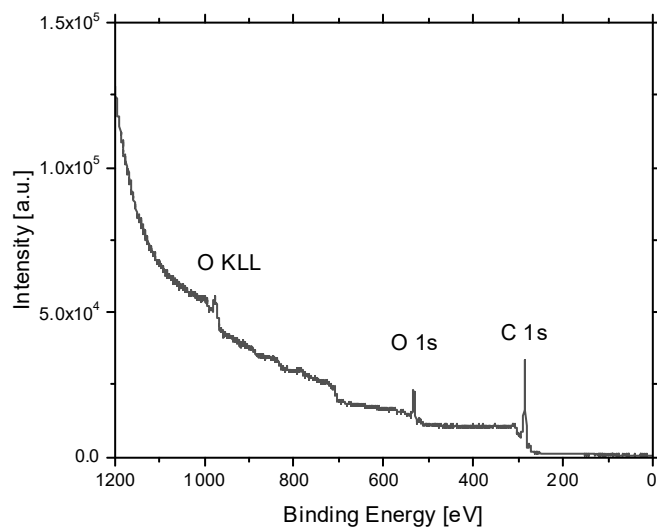

Fig.S2 The survey XPS spectra of pyrolyzed PEEK sample.

Table S4 Parameters of the models applied to kinetic test data.

| Model               | Parameter              | Pharmaceutical       |                      |
|---------------------|------------------------|----------------------|----------------------|
|                     |                        | Diclofenac           | Ofloxacin            |
| Pseudo-first order  | $q_e$ ( $mg\ g^{-1}$ ) | 0.18                 | 0.16                 |
|                     | $K_1$ ( $min^{-1}$ )   | 0.41                 | 0.22                 |
|                     | $R^2_{adj}$            | 0.99                 | 0.98                 |
|                     | $\chi^2$               | $1.85 \cdot 10^{-5}$ | $7.57 \cdot 10^{-5}$ |
| Pseudo-second order | $q_e$ ( $mg\ g^{-1}$ ) | 0.20                 | 0.19                 |

|                         |                                      |                      |                      |
|-------------------------|--------------------------------------|----------------------|----------------------|
|                         | $K_2(g\ mg^{-1}\ min^{-1})$          | 2.45                 | 1.18                 |
|                         | $R^2_{adj}$                          | 0.99                 | 0.98                 |
|                         | $\chi^2$                             | $2.12 \cdot 10^{-5}$ | $5.83 \cdot 10^{-5}$ |
| Elovich equation        | $a\ (mg\ g^{-1}\ min^{-1})$          | 0.18                 | 0.07                 |
|                         | $b\ (mg\ g^{-1})$                    | 22.34                | 19.90                |
|                         | $R^2_{adj}$                          | 0.97                 | 0.98                 |
|                         | $\chi^2$                             | $1.25 \cdot 10^{-4}$ | $7.61 \cdot 10^{-5}$ |
| Intraparticle diffusion | $k_{diff1}\ (mg\ g^{-1}\ min^{0.5})$ | 0.01                 | 0.01                 |
|                         | $C_1\ (mg\ g^{-1})$                  | -0.01                | -0.00                |
|                         | $R_1^2$                              | 0.99                 | 0.98                 |
|                         | $k_{diff2}\ (mg\ g^{-1}\ min^{0.5})$ | 0.00                 | 0.00                 |
|                         | $C_2\ (mg\ g^{-1})$                  | 0.10                 | 0.06                 |
|                         | $R_2^2$                              | 0.97                 | 0.99                 |
|                         | $k_{diff3}\ (mg\ g^{-1}\ min^{0.5})$ | $6.67 \cdot 10^{-4}$ | 0.00                 |
|                         | $C_3\ (mg\ g^{-1})$                  | 0.16                 | 0.05                 |
|                         | $R_3^2$                              | 0.97                 | 0.99                 |

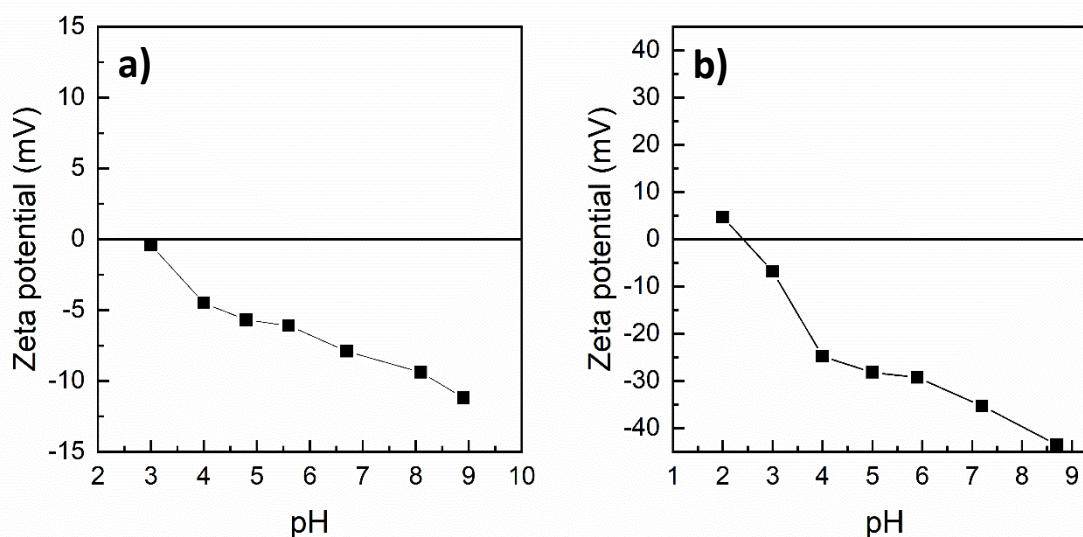

Fig.S3 Isoelectric point of a pyrolyzed PEEK a) in KCl solution, b) in distilled water.

Table S5 Zeta potential

| Material       | Solution   | Concentration ( $mg\ L^{-1}$ ) | Zeta potential (mV) | St.deviation |
|----------------|------------|--------------------------------|---------------------|--------------|
| pyrolyzed PEEK | water      | -                              | -28.1               | $\pm 0.7$    |
| pyrolyzed PEEK | KCl        | 74.55                          | -8.8                | $\pm 3.5$    |
| pyrolyzed PEEK | Ofloxacin  | $168.7 \times 10^{-3}$         | -28.4               | $\pm 0.3$    |
| pyrolyzed PEEK | Diclofenac | $148.7 \times 10^{-3}$         | -27.3               | $\pm 0.7$    |

Table S6 Parameters of the models applied to equilibrium test data.

| Model | Parameter | Pharmaceutical |           |
|-------|-----------|----------------|-----------|
|       |           | Diclofenac     | Ofloxacin |

|                      |                                 |       |        |
|----------------------|---------------------------------|-------|--------|
| Langmuir             | $Q_{max} (mg g^{-1})$           | 2.05  | 2.79   |
|                      | $K_L (L g^{-1})$                | 5.83  | 0.13   |
|                      | $R^2_{adj}$                     | 0.90  | 0.91   |
|                      | $\chi^2$                        | 0.02  | 0.11   |
| Freundlich           | $K_F (mg g^{-1})/(mg L^{-1})^n$ | 1.47  | 0.90   |
|                      | $n$                             | 0.13  | 0.29   |
|                      | $R^2_{adj}$                     | 0.91  | 0.99   |
|                      | $\chi^2$                        | 0.02  | 0.02   |
| Redlich-Peterson     | $KRP$                           | 21.62 | 201.61 |
|                      | $aRP$                           | 12.58 | 214.15 |
|                      | $g$                             | 0.93  | 0.73   |
|                      | $R^2_{adj}$                     | 0.99  | 0.98   |
|                      | $\chi^2$                        | 0.00  | 0.02   |
| Dubinin-Radushkevich | $q_{DR}(mg g^{-1})$             | 1.98  | 2.15   |
|                      | $K_{DR} (mol^2 kJ^{-2})$        | 0.03  | 0.04   |
|                      | $E (kJ mol^{-1})$               | 0.50  | 0.48   |
|                      | $R^2_{adj}$                     | 0.84  | 0.79   |
|                      | $\chi^2$                        | 0.04  | 0.25   |

Table S7 Kinetic parameters of diclofenac adsorption reported in literature.

| Publication          | Year | Material                                  | $c_0 (mg L^{-1})$ | Model               |
|----------------------|------|-------------------------------------------|-------------------|---------------------|
| this work            |      | pyrolyzed PEEK based carbonaceous sorbent | 0.1485            | pseudo-first order  |
| Viotti et al. [9]    | 2019 | moringa oleifera pod                      | 50                | pseudo-second order |
|                      |      | activated carbon                          | 50                | pseudo-second order |
| Avcu et al. [10]     | 2021 | sycamore ball activated carbon            | 10–50             | pseudo-second order |
| Bouhcain et al. [11] | 2022 | argan fruit shells activated carbon       | 100               | pseudo-second order |
| Bernardo et al. [12] | 2016 | potato peel waste activated carbon        | 50                |                     |
| Oumabady et al. [13] | 2022 | sludge derived hydrochar                  | 10–50             | pseudo-second order |
| de Luna et al. [14]  | 2017 | cocoa pod husk biosorbent                 |                   | pseudo-second order |
| Lonappan et al. [15] | 2018 | pig manure biochar                        | 2                 | pseudo-second order |
|                      |      | pine wood biochar                         | 2                 | pseudo-second order |

Table S8 Kinetic parameters of ofloxacin adsorption reported in literature.

| Publication | Year | Material | $c_0 (mg L^{-1})$ | Model |
|-------------|------|----------|-------------------|-------|
|-------------|------|----------|-------------------|-------|

|                      |      |                                                           |         |                     |
|----------------------|------|-----------------------------------------------------------|---------|---------------------|
| this work            |      | pyrolyzed PEEK based carbonaceous sorbent                 | 0.1687  | pseudo-second order |
| Kong et al. [16]     | 2017 | luffa sponge activated carbon                             | 30–70   | pseudo-second order |
| Weng et al. [17]     | 2021 | calcined magnetic iron nanoparticles                      | 5–50    | pseudo-second order |
| Liu et al. [18]      | 2022 | natural ilmenite-biochar composite                        | 2–25    | pseudo-second order |
| He et al. [19]       | 2022 | N-doped activated carbon                                  | 110–250 | pseudo-second order |
| Akhtar et al. [20]   | 2021 | various organic waste based biochars                      |         | pseudo-second order |
|                      |      | municipal organic waste based biochar pyrolyzed at 300 °C |         | Elovich             |
| Sulaiman et al. [21] | 2022 | chemically modified cassava stem activated carbon         |         | pseudo-second order |
| Wang et al. [22]     | 2022 | copper-doped ZIF-8                                        | 260     | pseudo-second order |
| Zhang et al. [23]    | 2011 | modified coal fly ash                                     | 100     | pseudo-second order |
| Zhu et al. [24]      | 2018 | chitosan/biochar composite                                | 10      | pseudo-second order |

Table S9 Adsorption capacities of diclofenac reported in literature.

| Publication           | Year | Material                                  | $q_{\max}$ (mg g <sup>-1</sup> ) |
|-----------------------|------|-------------------------------------------|----------------------------------|
| this work             |      | pyrolyzed PEEK based carbonaceous sorbent | 2.25                             |
| de Franco et al. [25] | 2018 | activated carbon                          | 36.23                            |
| Viotti et al. [9]     | 2019 | moringa oleifera pod                      | 56.692                           |
|                       |      | activated carbon                          | 47.125                           |
| Avcu et al. [10]      | 2021 | sycamore ball activated carbon            | 178.89                           |
| Bouhcain et al. [11]  | 2022 | argan fruit shells activated carbon       | 126.16                           |
| Bernardo et al. [12]  | 2016 | potato peel waste activated carbon        | 68.5                             |
| Oumabady et al. [13]  | 2022 | sludge derived hydrochar                  | 31.746                           |
| Jodeh et al. [26]     | 2016 | cyclamen persicum tubers activated carbon | 22.22                            |
| Lonappan et al. [15]  | 2018 | pig manure biochar                        | 12.5                             |
|                       |      | pine wood biochar                         | 0.526                            |
| de Luna et al. [14]   | 2017 | cocoa pod husk biosorbent                 | 0.474                            |

Table S10 Adsorption capacities of ofloxacin reported in literature.

| Publication        | Year | Material                                  | $q_{\max}$ (mg g <sup>-1</sup> ) |
|--------------------|------|-------------------------------------------|----------------------------------|
| this work          |      | pyrolyzed PEEK based carbonaceous sorbent | 2.84                             |
| Kong et al. [16]   | 2017 | luffa sponge activated carbon             | 131.93                           |
| Weng et al. [17]   | 2021 | calcined magnetic iron nanoparticles      | 17.5                             |
| Liu et al. [18]    | 2022 | natural ilmenite-biochar composite        | 14.226                           |
| He et al. [19]     | 2022 | N-doped activated carbon                  | 796.153                          |
| Akhtar et al. [20] | 2021 | various organic waste based biochars      | 234.3–3 702                      |
| Wang et al. [22]   | 2022 | copper-doped ZIF-8                        | 757.58                           |
| Zhang et al. [23]  | 2011 | modified coal fly ash                     | 2.41                             |
| Zhu et al. [24]    | 2018 | chitosan/biochar composite                | 6.64                             |

## References (Supporting information)

- [1] LAGERGREN, S. About the theory of so-called adsorption of soluble substances. Kungliga Svenska Vetenskapsakademiens Handlingar, 1898, 24(4), 1-39.
- [2] BLANCHARD, G., M. MAUNAYE AND G. MARTIN REMOVAL OF HEAVY-METALS FROM WATERS BY MEANS OF NATURAL ZEOLITES. Water Research, 1984, 18(12), 1501-1507.

- [3] S. ROGINSKY, Y. B. Z. The catalytic oxidation of carbon monoxide on manganese dioxide. *Acta Physicochimica URSS* 1934, 1, 554.
- [4] WEBER, W. J., MORRIS, J.C. Kinetics of adsorption of carbon from solution. *Journal of the Sanitary Engineering Division*, 1963, 89(2), 31-60.
- [5] LANGMUIR, I. The adsorption of gases on plane surfaces of glass, mica and platinum. *Journal of the American Chemical Society*, 1918, 40(9), 1361-1403.
- [6] FREUNDLICH, H. Über die Adsorption in Lösungen. *Zeitschrift für Physikalische Chemie*, 1906, 57, 385-471.
- [7] REDLICH, O. AND D. L. PETERSON A USEFUL ADSORPTION ISOTHERM. *Journal of Physical Chemistry*, 1959, 63(6), 1024-1024.
- [8] DUBININ, M., RADUSHKEVICH, L. Equation of the characteristic curve of activated charcoal. *Chemisches Zentralblatt*, 1947, 1(1), 875.
- [9] VIOTTI, P. V., W. M. MOREIRA, O. A. A. DOS SANTOS, R. BERGAMASCO, et al. Diclofenac removal from water by adsorption on *Moringa oleifera* pods and activated carbon: Mechanism, kinetic and equilibrium study. *Journal of Cleaner Production*, May 2019, 219, 809-817.
- [10] AVCU, T., O. UNER AND U. GECGEL Adsorptive removal of diclofenac sodium from aqueous solution onto sycamore ball activated carbon - isotherms, kinetics, and thermodynamic study. *Surfaces and Interfaces*, Jun 2021, 24.
- [11] BOUHCAIN, B., D. CARRILLO-PENA, F. EL MANSOURI, Y. E. ZOUBI, et al. Removal of Emerging Contaminants as Diclofenac and Caffeine Using Activated Carbon Obtained from Argan Fruit Shells. *Applied Sciences-Basel*, Mar 2022, 12(6).
- [12] BERNARDO, M., S. RODRIGUES, N. LAPA, I. MATOS, et al. High efficacy on diclofenac removal by activated carbon produced from potato peel waste. *International Journal of Environmental Science and Technology*, Aug 2016, 13(8), 1989-2000.
- [13] OUMABADY, S., P. S. SELVARAJ, K. PERIASAMY, D. VEERASWAMY, et al. Kinetic and isotherm insights of Diclofenac removal by sludge derived hydrochar. *Scientific Reports*, Feb 2022, 12(1).
- [14] DE LUNA, M. D. G., MURNIATI, W. BUDIANTA, K. K. P. RIVERA, et al. Removal of sodium diclofenac from aqueous solution by adsorbents derived from cocoa pod husks. *Journal of Environmental Chemical Engineering*, Apr 2017, 5(2), 1465-1474.
- [15] LONAPPAN, L., T. ROUISSI, S. K. BRAR, M. VERMA, et al. An insight into the adsorption of diclofenac on different biochars: Mechanisms, surface chemistry, and thermodynamics. *Bioresource Technology*, Feb 2018, 249, 386-394.
- [16] KONG, Q., X. HE, L. SHU AND M. S. MIAO Ofloxacin adsorption by activated carbon derived from luffa sponge: Kinetic, isotherm, and thermodynamic analyses. *Process Safety and Environmental Protection*, Nov 2017, 112, 254-264.
- [17] WENG, X. L., W. L. CAI, G. OWENS AND Z. L. CHEN Magnetic iron nanoparticles calcined from biosynthesis for fluoroquinolone antibiotic removal from wastewater. *Journal of Cleaner Production*, Oct 2021, 319.
- [18] LIU, Y. J., Y. YI, Z. W. WANG, W. YUAN, et al. Removal of ofloxacin from water by natural ilmenite-biochar composite: A study on the synergistic adsorption mechanism of multiple effects. *Bioresource Technology*, Nov 2022, 363.
- [19] HE, S., Q. L. CHEN, G. Y. CHEN, G. B. SHI, et al. N-doped activated carbon for high-efficiency ofloxacin adsorption. *Microporous and Mesoporous Materials*, Apr 2022, 335.
- [20] AKHTAR, L., M. AHMAD, S. IQBAL, A. A. ABDELHAFEZ, et al. Biochars' adsorption performance towards moxifloxacin and ofloxacin in aqueous solution: Role of pyrolysis temperature and biomass type. *Environmental Technology & Innovation*, Nov 2021, 24.
- [21] SULAIMAN, N. S., M. H. M. AMINI, M. DANISH, O. SULAIMAN, et al. Characterization and Ofloxacin Adsorption Studies of Chemically Modified Activated Carbon from Cassava Stem. *Materials*, Aug 2022, 15(15).
- [22] WANG, X. W., Y. J. ZHAO, Y. Q. SUN AND D. H. LIU Highly Effective Removal of Ofloxacin from Water with Copper-Doped ZIF-8. *Molecules*, Jul 2022, 27(13).



- [23] ZHANG, C. L., F. ZHAO AND Y. WANG Thermodynamic and Kinetic Parameters of Ofloxacin Adsorption from Aqueous Solution onto Modified Coal Fly Ash. *Russian Journal of Physical Chemistry A*, Apr 2012, 86(4), 653-657.
- [24] ZHU, C. M., Y. H. LANG, B. LIU AND H. X. ZHAO Ofloxacin Adsorption on Chitosan/Biochar Composite: Kinetics, Isotherms, and Effects of Solution Chemistry. *Polycyclic Aromatic Compounds*, May 2019, 39(3), 287-297.
- [25] DE FRANCO, M. A. E., C. B. DE CARVALHO, M. M. BONETTO, R. D. SOARES, et al. Diclofenac removal from water by adsorption using activated carbon in batch mode and fixed-bed column: Isotherms, thermodynamic study and breakthrough curves modeling. *Journal of Cleaner Production*, Apr 2018, 181, 145-154.
- [26] JODEH, S., ABDELWAHAB, F., JARADAT, N., WARAD, I., JODEH, W. Adsorption of diclofenac from aqueous solution using *Cyclamen persicum* tubers based activated carbon (CTAC). *Journal of the Association of Arab Universities for Basic and Applied Sciences*, 2016, 20, 32-38.
